# Supplementary material for: Antigen- and scaffold-specific antibody responses to protein nanoparticle immunogens
Source: PubMed Central journal article supplement (PMC9589121; doi:10.1016/j.xcrm.2022.100780), 2022-09-26
Supplement: mmc1.pdf [file mmc1.pdf]

**Supplemental information**

**Antigen- and scaffold-specific antibody  
responses to protein nanoparticle immunogens**

**John C. Kraft, Minh N. Pham, Laila Shehata, Mitch Brinkkemper, Seyhan Boyoglu-Barnum, Kaitlin R. Sprouse, Alexandra C. Walls, Suna Cheng, Mike Murphy, Deleah Pettie, Maggie Ahlrichs, Claire Sydeman, Max Johnson, Alyssa Blackstone, Daniel Ellis, Rashmi Ravichandran, Brooke Fiala, Samuel Wrenn, Marcos Miranda, Kwinten Sliepen, Philip J.M. Brouwer, Aleksandar Antanasijevic, David Veessler, Andrew B. Ward, Masaru Kanekiyo, Marion Pepper, Rogier W. Sanders, and Neil P. King**

**Supplemental information**

**Antigen- and scaffold-specific antibody  
responses to protein nanoparticle immunogens**

**John C. Kraft, Minh N. Pham, Laila Shehata, Mitch Brinkkemper, Seyhan Boyoglu-Barnum, Kaitlin R. Sprouse, Alexandra C. Walls, Suna Cheng, Mike Murphy, Deleah Pettie, Maggie Ahlrichs, Claire Sydeman, Max Johnson, Alyssa Blackstone, Daniel Ellis, Rashmi Ravichandran, Brooke Fiala, Samuel Wrenn, Marcos Miranda, Kwinten Sliepen, Philip J.M. Brouwer, Aleksandar Antanasijevic, David Veessler, Andrew B. Ward, Masaru Kanekiyo, Marion Pepper, Rogier W. Sanders, and Neil P. King**

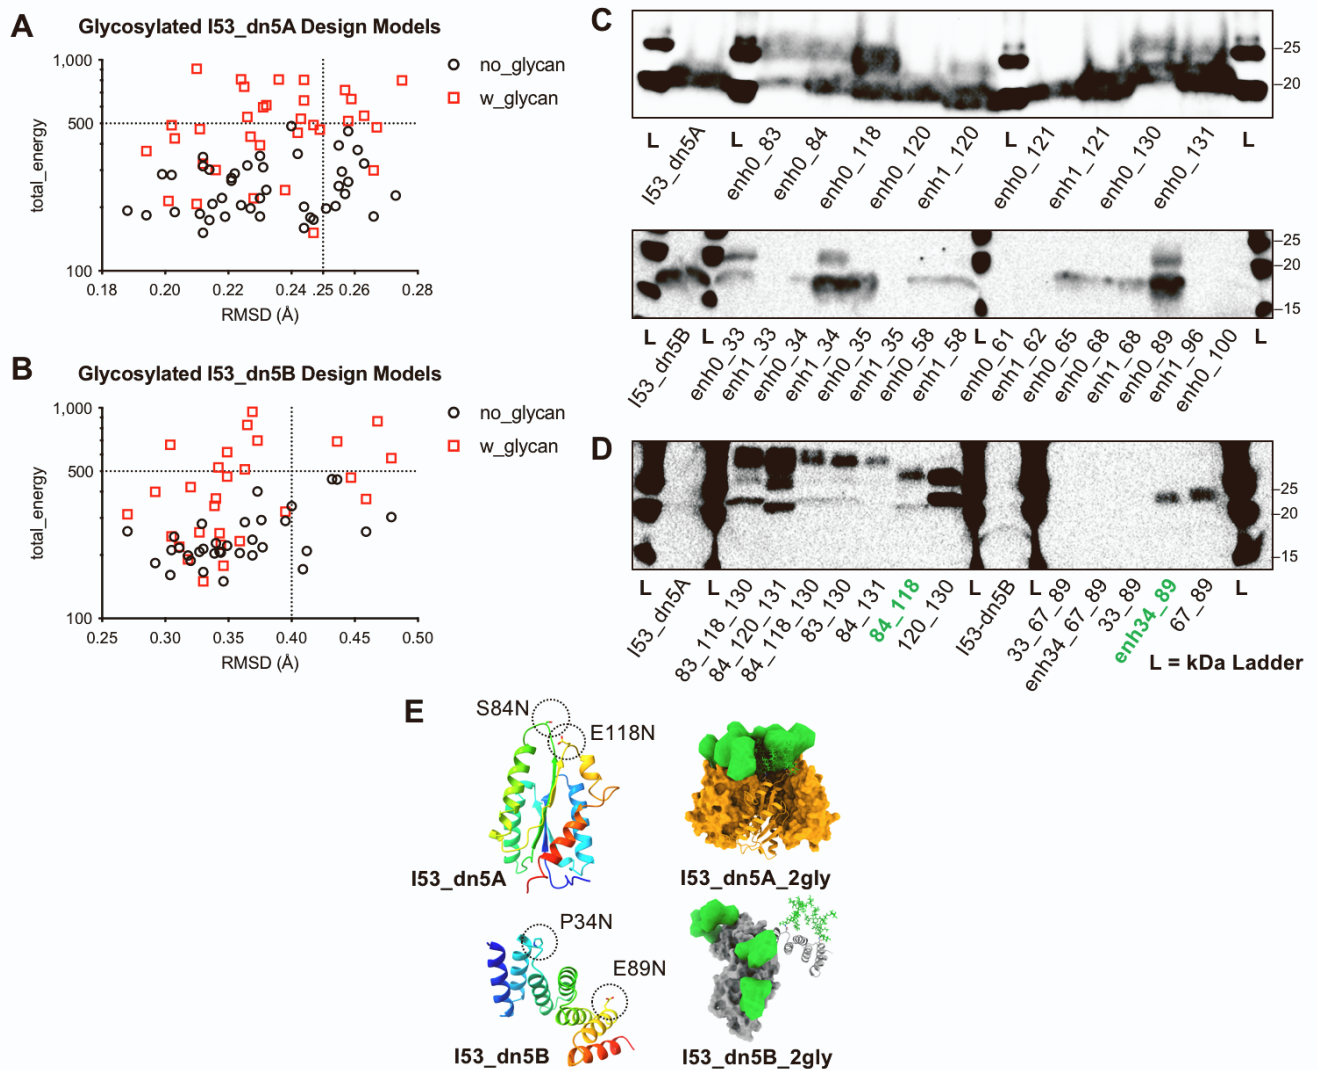

**Figure S1. Design of Glycosylated I53\_dn5 Nanoparticle Scaffolds, Related to Figure 1**

(A and B) Rosetta total\_energy vs. backbone (C $\alpha$ ) root mean square deviation (RMSD, Å) for design models of glycosylated I53\_dn5A pentamers (A) and I53\_dn5B trimers (B). Dotted lines indicate filter cut-offs for selection of designs to experimentally test for protein expression and glycosylation.

(C and D) Reducing western blots of concentrated cell supernatants for single PNGS variants (C) and combination PNGS variants (D) for glycosylated I53\_dn5A pentamer and I53\_dn5B trimer designs, detected using a mouse anti-myc tag primary mAb and a horse anti-mouse HRP-coupled secondary mAb. Numbers indicate the amino acid residue where an Asn was inserted. enh0, typical (non-enhanced) N-linked sequon; enh1, enhanced N-linked sequon. Glycosylated I53\_dn5A and I53\_dn5B variants carried forward for nanoparticle immunogen assembly and *in vivo* testing are indicated in green. L, molecular weight ladder.

(E) Schematic representations of glycosylated I53\_dn5A and I53\_dn5B showing the Asn insert locations on each protomer (left) and the glycosylated oligomers (right; glycans in green, I53\_dn5A in orange, and I53\_dn5B in gray; a single subunit of each oligomer shown as cartoon for detail).

**A Glycosylated I53\_dn5**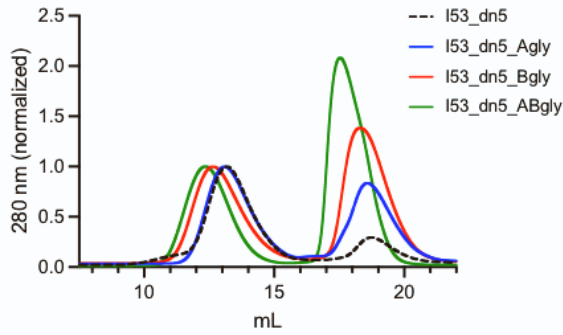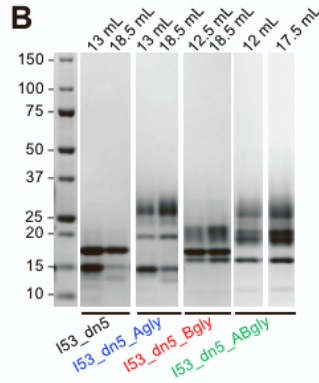**C PEGylated I53\_dn5**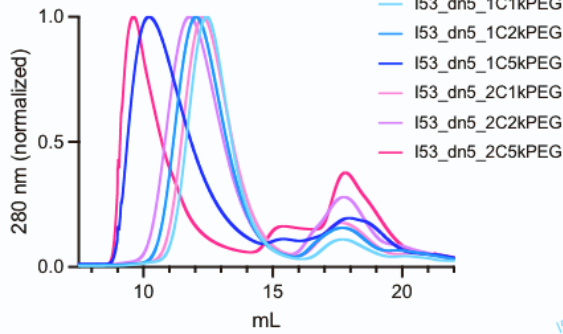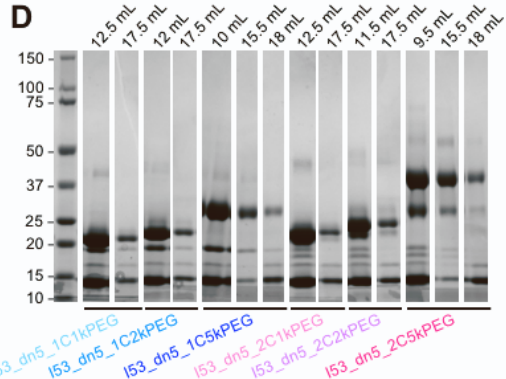**E I53\_dn5 w/ unstructured polypeptides**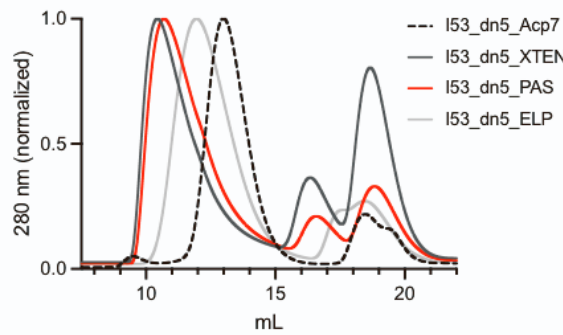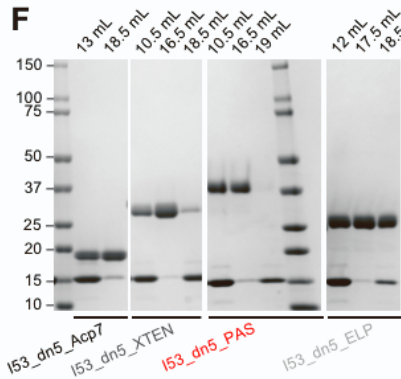**G PEGylated HA-I53\_dn5**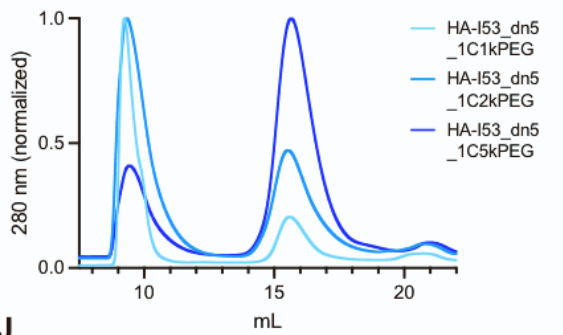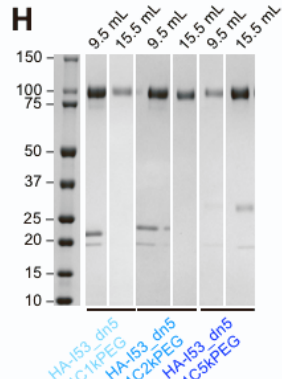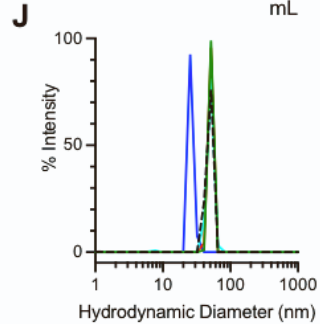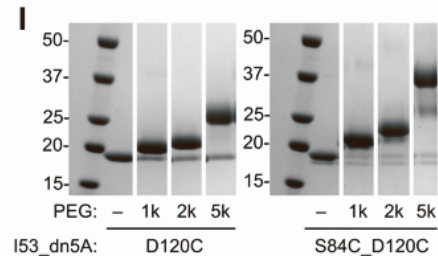

**Figure S2. Characterization of Glycosylated, PEGylated, and PASylated I53\_dn5 Nanoparticle Scaffolds, Related to Figure 1**

(A, C, and E) SEC purification of the I53\_dn5 scaffold masked with glycans (A), PEG (C), or unstructured polypeptides (E) after *in vitro* assembly using a Superose 6 Increase 10/300 GL column. The nanoparticles elute at 9-15 mL and residual, unassembled components elute at larger volumes. In addition to the peak shifts being consistent with the molecular weight of the masking agent, in most cases modest effects on the *in vitro* assembly efficiency were also observed.

(B, D, and F) Reducing SDS-PAGE of SEC-purified I53\_dn5 scaffold masked with glycans (D), PEG (D), or unstructured polypeptides (F) and residual, unassembled components. The presence of more unassembled components in the 18.5 mL peak for I53\_dn5\_Bgly compared to I53\_dn5\_Agly indicates that the I53\_dn5B\_2gly component has the lower nanoparticle assembly efficiency (A and B). Similarly, 5 kDa PEG, XTEN, and PAS polypeptides all have larger amounts of unassembled components in the 15-20 mL elution volumes compared to the smaller 1 and 2 kDa PEG and ELP polypeptide, indicating that these larger masking agents impeded nanoparticle assembly efficiency the most (C-F). From the SDS-PAGE presented in panel (D), we estimate PEG conjugation efficiency was >90% in all cases.

(G) SEC purification of PEGylated HA-I53\_dn5 nanoparticle immunogens after *in vitro* assembly using a Superose 6 Increase 10/300 GL column. The nanoparticle immunogen elutes at the void volume. Residual, unassembled components elute around 15-18 mL. Note the declining *in vitro* assembly efficiency as the PEG molecular weight increases, suggesting larger PEG sterically hinders nanoparticle assembly when HA is fused to the I53\_dn5B trimer.

(H) Reducing SDS-PAGE of SEC-purified PEGylated HA-I53\_dn5 nanoparticle immunogens and residual, unassembled components. Only excess HA-I53\_dn5B trimer was detected in the residual, unassembled component peak for both HA-I53\_dn5\_1C1kPEG and HA-I53\_dn5\_1C2kPEG immunogens, confirming complete nanoparticle assembly. However, both HA-I53\_dn5B trimer and I53\_dn5A\_1C5kPEG pentamer were present in the 15.5 mL unassembled component peak for HA-I53\_dn5\_1C5kPEG immunogen, indicating that 5 kDa PEG on the I53\_dn5A pentamer impeded efficient nanoparticle assembly.

(I) Reducing SDS-PAGE of I53\_dn5A\_D120C and I53\_dn5A\_S84C\_D120C pentamers coupled to 1, 2, or 5 kDa PEG. Note the larger molecular weight shifts when PEG is coupled to I53\_dn5A\_S84C\_D120C compared to I53\_dn5A\_D120C due to the presence of two unpaired cysteines (10 vs. 5 cysteines per pentamer, respectively). We estimate PEG conjugation efficiency was >90% in all cases.

(J) Dynamic light scattering of SEC-purified nanoparticle immunogens, including unmodified I53\_dn5.

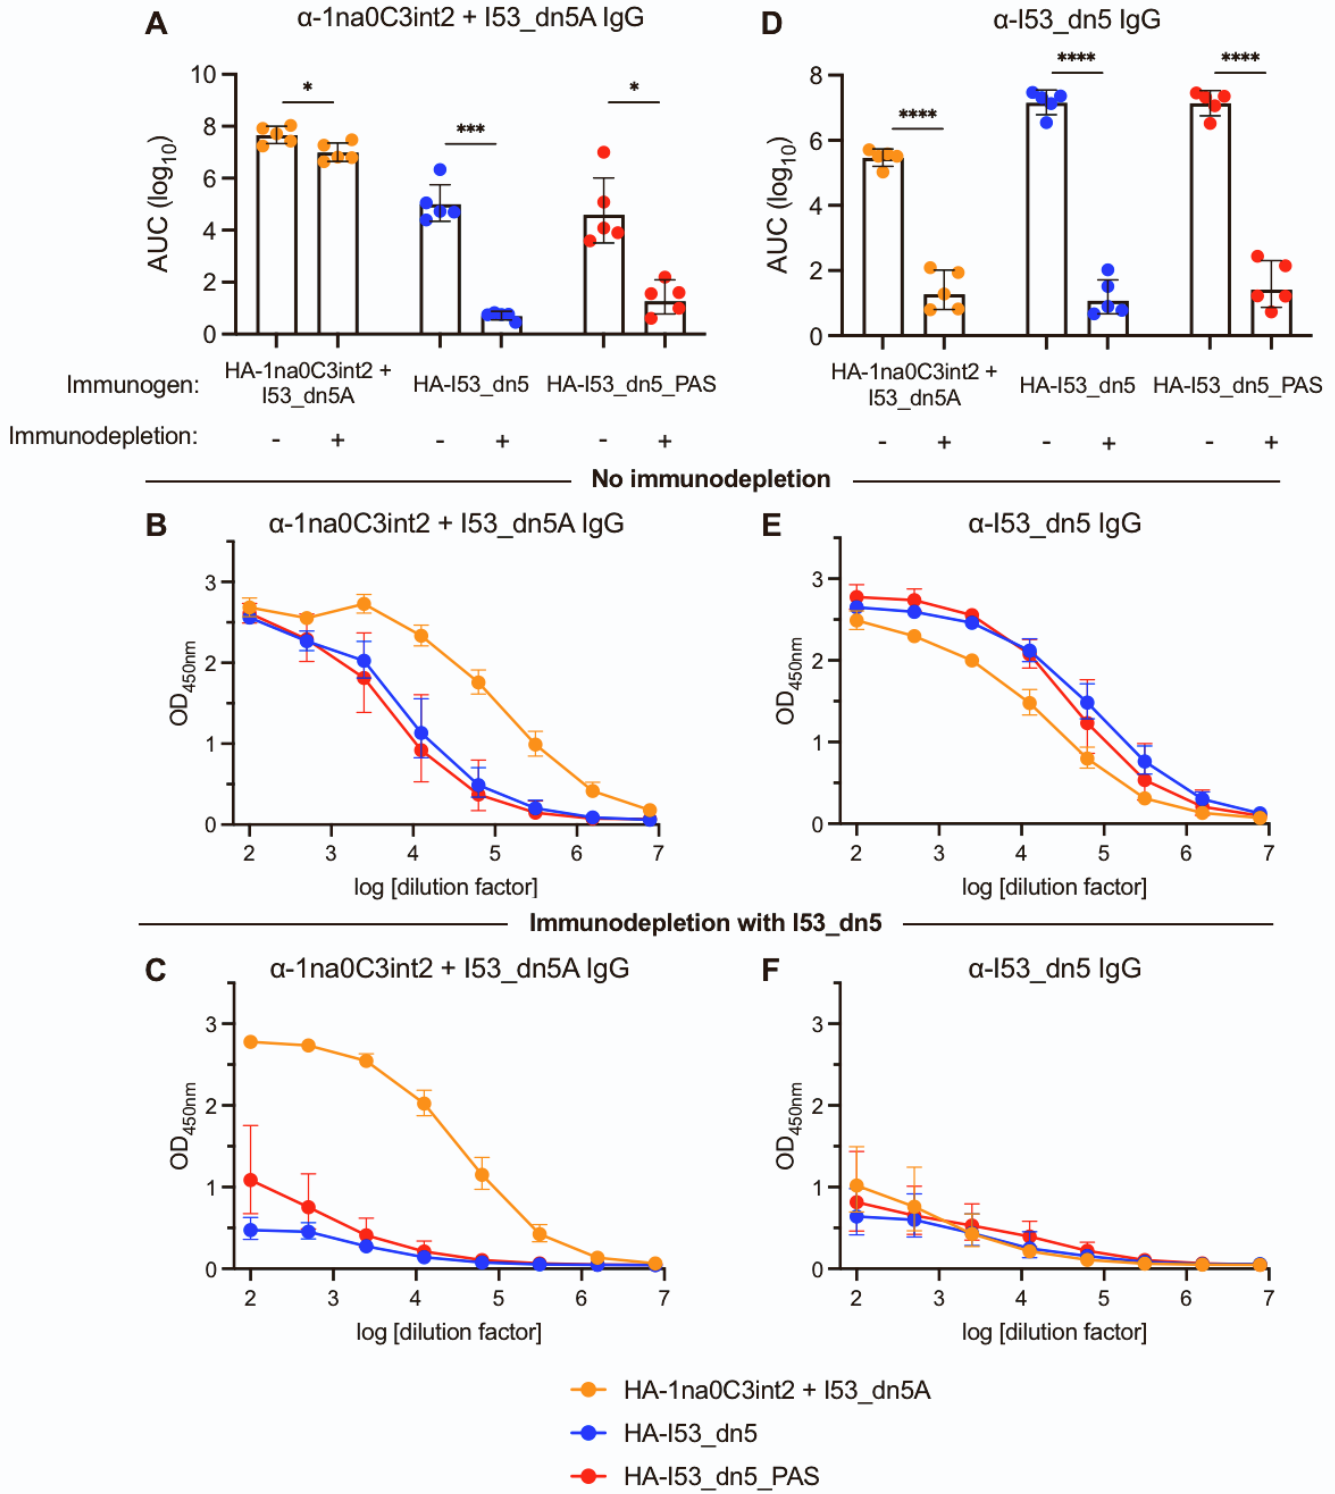

**Figure S3. HA-I53\_dn5 and HA-I53\_dn5\_PAS Nanoparticle Immunogens Elicit Minimal Antibodies Against Epitopes on the Interior Surface of the Nanoparticle Scaffold, Related to Figure 2**

(A-F) Post-2<sup>nd</sup> boost (week 10) anti-unassembled HA-I53\_dn5 nanoparticle components (HA-1na0C3int2 trimer + I53\_dn5A pentamer) (A-C) and anti-I53\_dn5 nanoparticle (D-F) serum IgG binding titers in BALB/c mice, measured by ELISA and plotted as the area under the curve (AUC) (A and D) for each serum dilution series (B, C, E, and F). Week 10 sera from mice immunized with either HA-1na0C3int2 + I53\_dn5A unassembled components, HA-I53\_dn5 nanoparticles, or HA-I53\_dn5\_PAS nanoparticles were analyzed for antibody titer against unassembled HA-I53\_dn5 nanoparticle components (HA-1na0C3int2 trimer + I53\_dn5A pentamer) (A-C) or I53\_dn5 nanoparticles (D-F) before (B and E) or after (C and F) immunodepletion with I53\_dn5. (A and D) Each symbol represents an individual animal and the geometric mean AUC and the geometric mean standard deviation from each group is indicated by the bar and error bar, respectively (N=5 mice/group).

*P* values between groups were determined by Brown-Forsythe and Welch one-way ANOVA test, with Dunnett's T3 multiple comparisons test. \**p* < 0.05; \*\**p* < 0.01; \*\*\**p* < 0.001; \*\*\*\**p* < 0.0001.

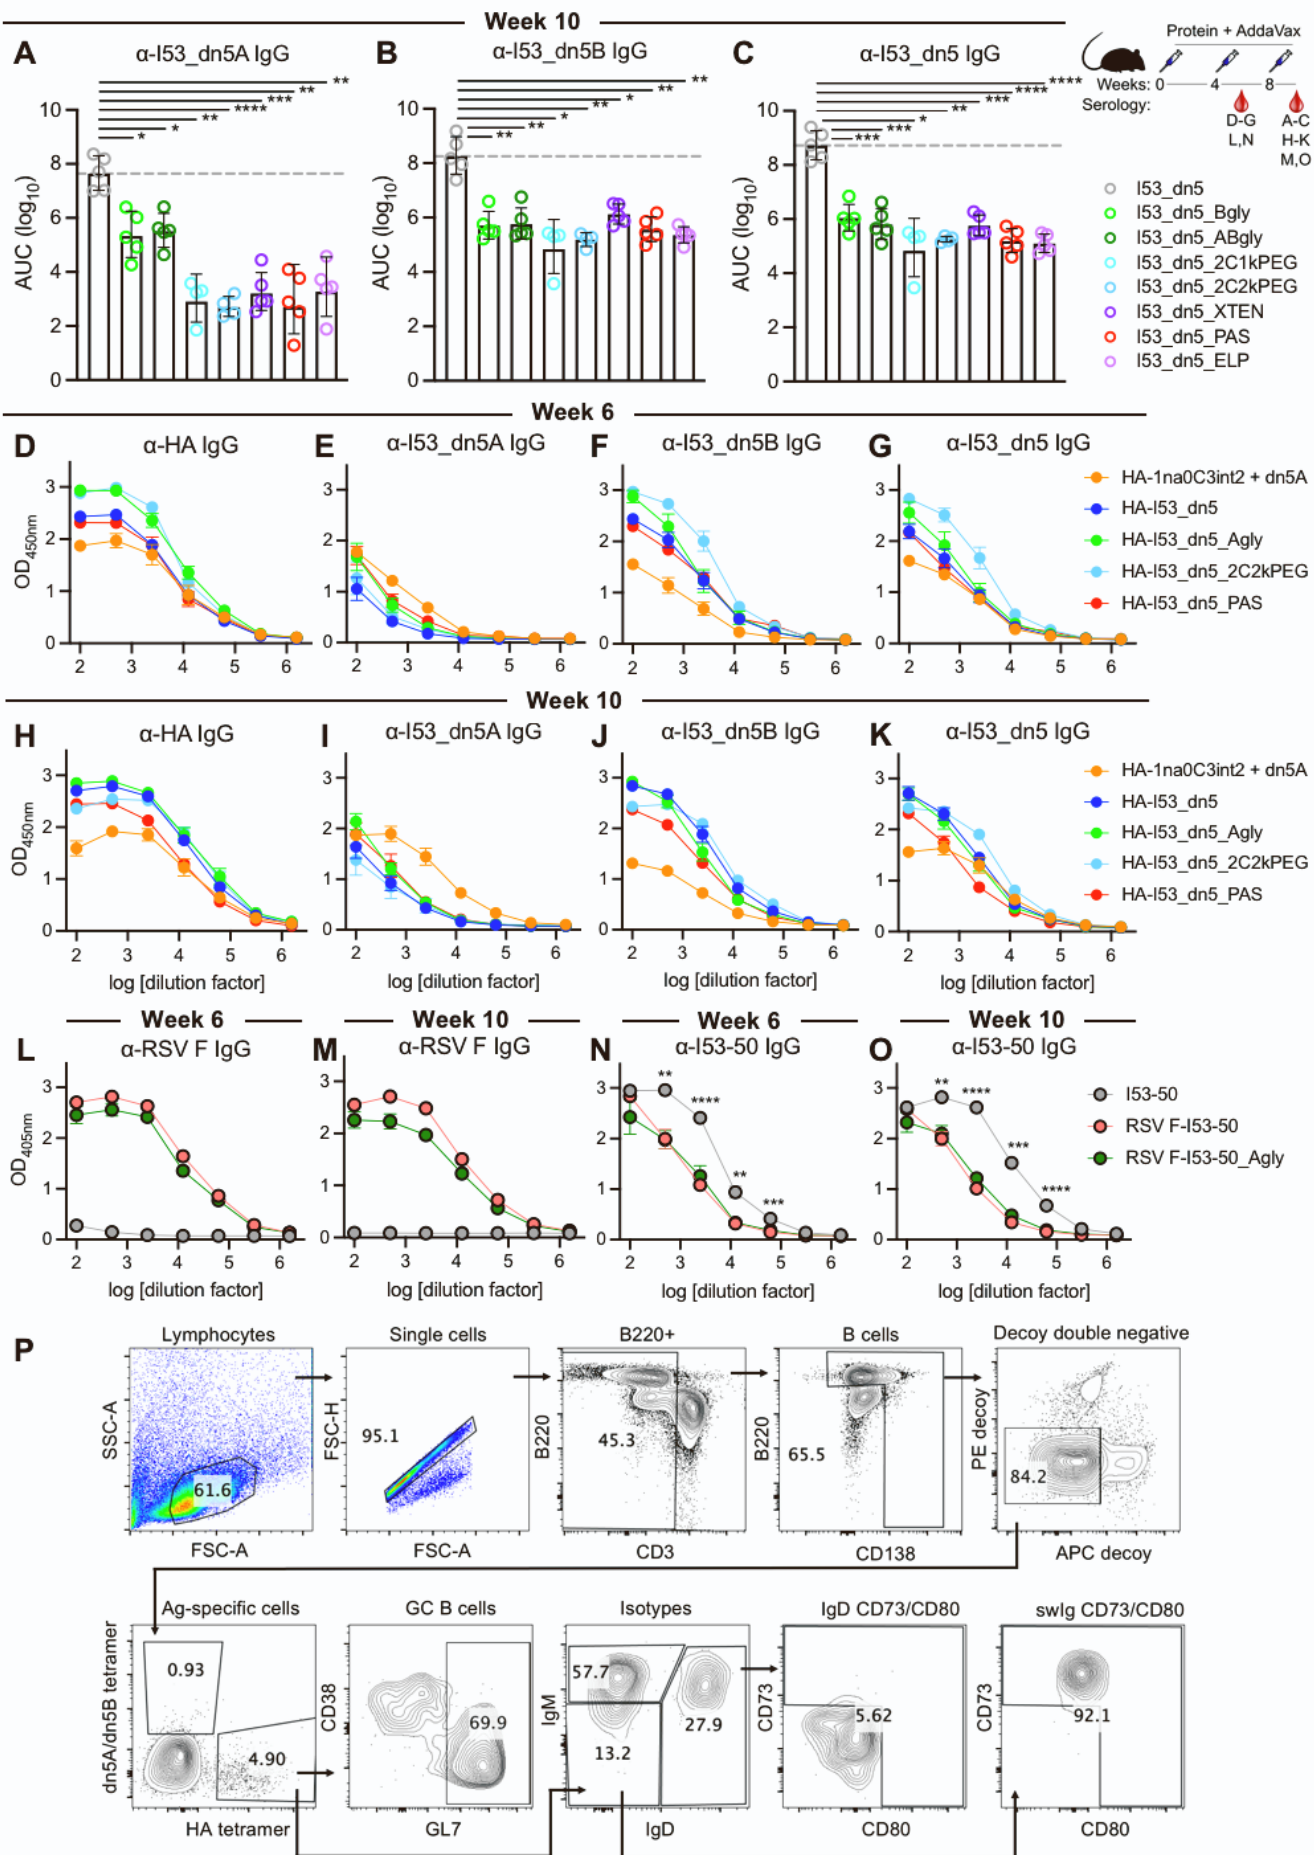



**Figure S4. Masking the I53\_dn5 Scaffold Reduces Scaffold-specific Antibody Responses when no Glycoprotein Antigen is Present, but Scaffold Masking does not Enhance Antigen-specific Responses when I53\_dn5 and I53-50 Scaffolds Display a Glycoprotein Antigen, Related to Figure 2**

(A-C) Post-2<sup>nd</sup> boost (week 10) anti-I53\_dn5A pentamer (A), anti-I53\_dn5B trimer (B), and anti-I53\_dn5 nanoparticle (C) serum IgG binding titers in BALB/c mice, measured by ELISA and plotted as the area under the curve (AUC) for each serum dilution series. Each symbol represents an individual animal and the geometric mean AUC and the geometric mean standard deviation from each group is indicated by the bar and error bar, respectively (N=5 mice/group). The gray dashed line represents levels for the unmodified I53\_dn5 nanoparticle for comparison. The inset depicts the study timeline and the blood collection time point that each data panel represents. *P* values between groups were determined by Brown-Forsythe and Welch one-way ANOVA test, with Dunnett's T3 multiple comparisons test. \**p* < 0.05; \*\**p* < 0.01; \*\*\**p* < 0.001; \*\*\*\**p* < 0.0001.

(D-K) Post-1<sup>st</sup> boost (week 6) (D-G) and post-2<sup>nd</sup> boost (week 10) (H-K) anti-H1MI15 influenza hemagglutinin (D and H), anti-I53\_dn5A pentamer (E and I), anti-I53\_dn5B trimer (F and J), and anti-I53\_dn5 nanoparticle (G and K) serum IgG ELISA curves in BALB/c mice. Each symbol represents the geometric mean absorbance at 450 nm +/- geometric mean SD (N=5 mice/group).

(L-O) Post-1<sup>st</sup> boost (week 6) (L and N) and post-2<sup>nd</sup> boost (week 10) (M and O) anti-DS-Cav1 RSV F protein (L and M) and anti-I53-50 nanoparticle (N and O) IgG ELISA curves in BALB/c mice. Each symbol represents the geometric mean absorbance at 450 nm +/- geometric mean SD (N=5 mice/group). *P* values between the 405 nm absorption values for I53-50 and RSV F-I53-50 at the indicated serum dilutions were determined by unpaired *t* tests. \**p* < 0.05; \*\**p* < 0.01; \*\*\**p* < 0.001; \*\*\*\**p* < 0.0001.

(P) Representative gating strategy for evaluating I53\_dn5A-, I53\_dn5B-, and HA-specific B cells, germinal center (GC) precursors and B cells (CD38<sup>+/</sup>GL7<sup>+</sup>), and B cell isotypes. Top row, gating strategy for measuring numbers of live, non-doublet B cells. Bottom row, representative data from a mouse immunized with HA-I53\_dn5 formulated with AddaVax. HA<sup>+</sup>CD38<sup>+/</sup>GL7<sup>+</sup> cells that did not bind decoys were counted as antigen-specific GC precursors and B cells. GC precursors and B cells were further analyzed to characterize B cell receptor isotypes.

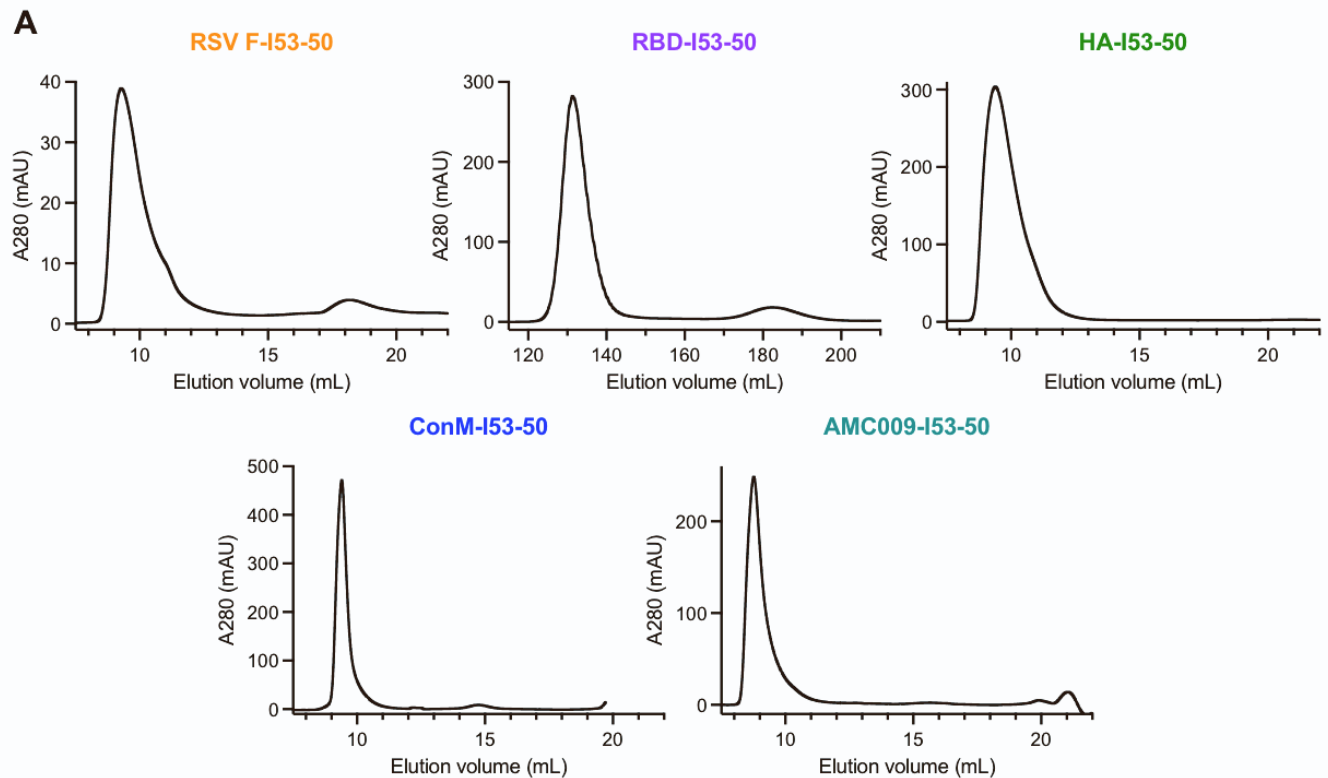

**B**

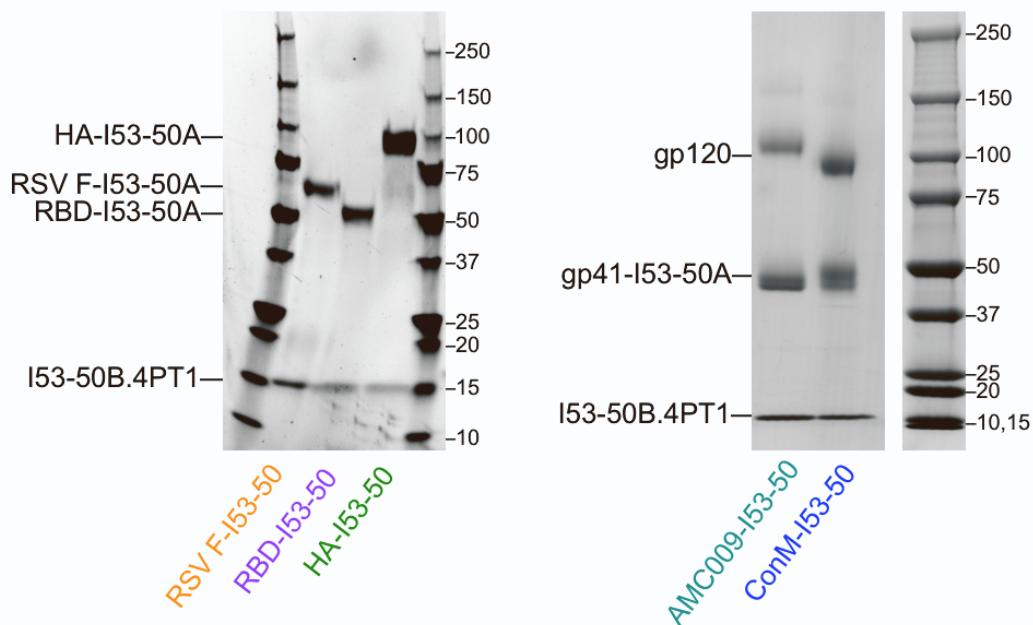

**Figure S5. SEC Purification and SDS-PAGE of I53-50-based Nanoparticle Immunogens, Related to Figure 3**

(A and B) SEC chromatograms from purification of the RSV F-I53-50, RBD-I53-50, HA-I53-50, ConM-I53-50, and AMC009-I53-50 nanoparticle immunogens after *in vitro* assembly using a HiLoad 26/600 Superdex 200 pg column for RBD-I53-50 and a Superose 6 Increase 10/300 GL column for the other nanoparticle immunogens (A), and SDS-PAGE of these nanoparticle immunogens after SEC purification (B).

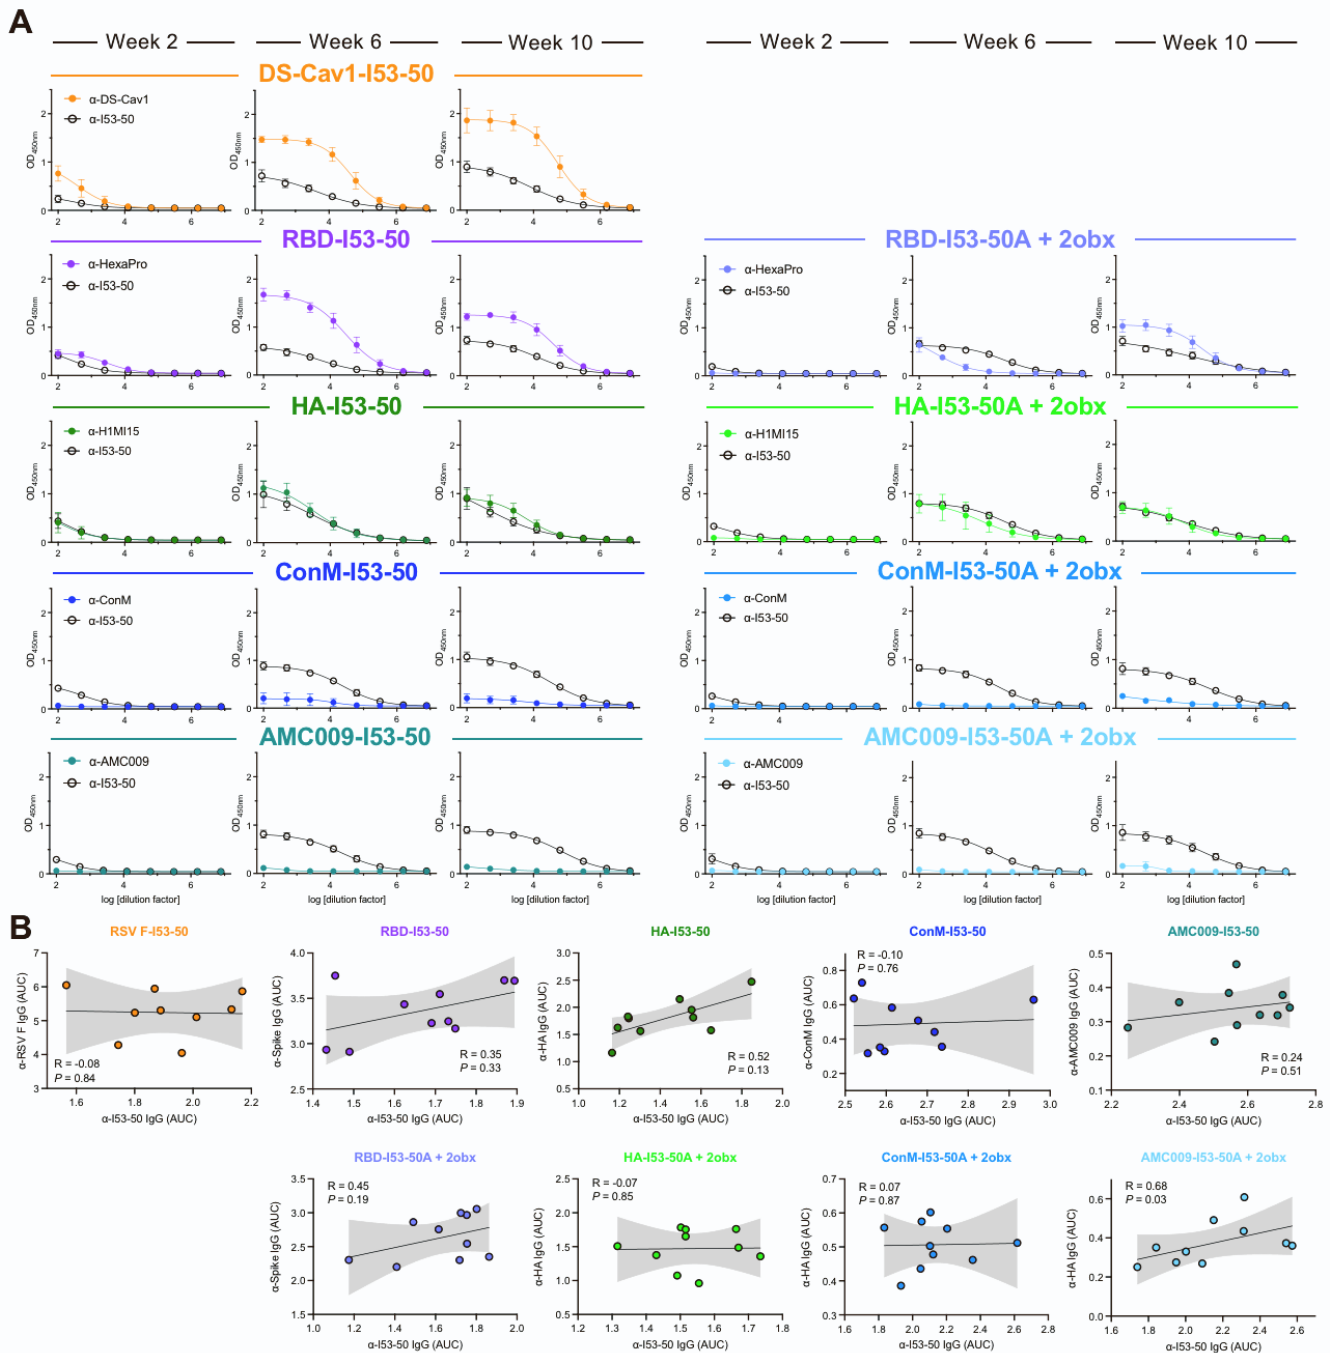

**Figure S6. Individual ELISA Curves for a Series of Different I53-50-based Nanoparticle Immunogens and Non-assembling Controls, Related to Figure 3**

(A) Post-prime (week 2), post-1<sup>st</sup> boost (week 6), and post-2<sup>nd</sup> boost (week 10) antigen-specific (solid colored circles) and anti-I53-50 nanoparticle (open black circles) serum IgG ELISA curves in BALB/c mice. Antigen-specific IgG titers were measured by Ni-NTA-capture ELISA. Each symbol represents the geometric mean absorbance at 450 nm +/- geometric mean SD (N=10 mice/group). Immunogen labels are listed at the top of their respective ELISA plots.

(B) Spearman's correlations between post-2<sup>nd</sup> boost (week 10) anti-antigen and anti-I53-50 scaffold serum IgG titers (AUC) for each individual immunogen. Shaded areas represent 95% confidence intervals of the plotted linear regression line. Each symbol represents a mouse (N=10 per immunogen).

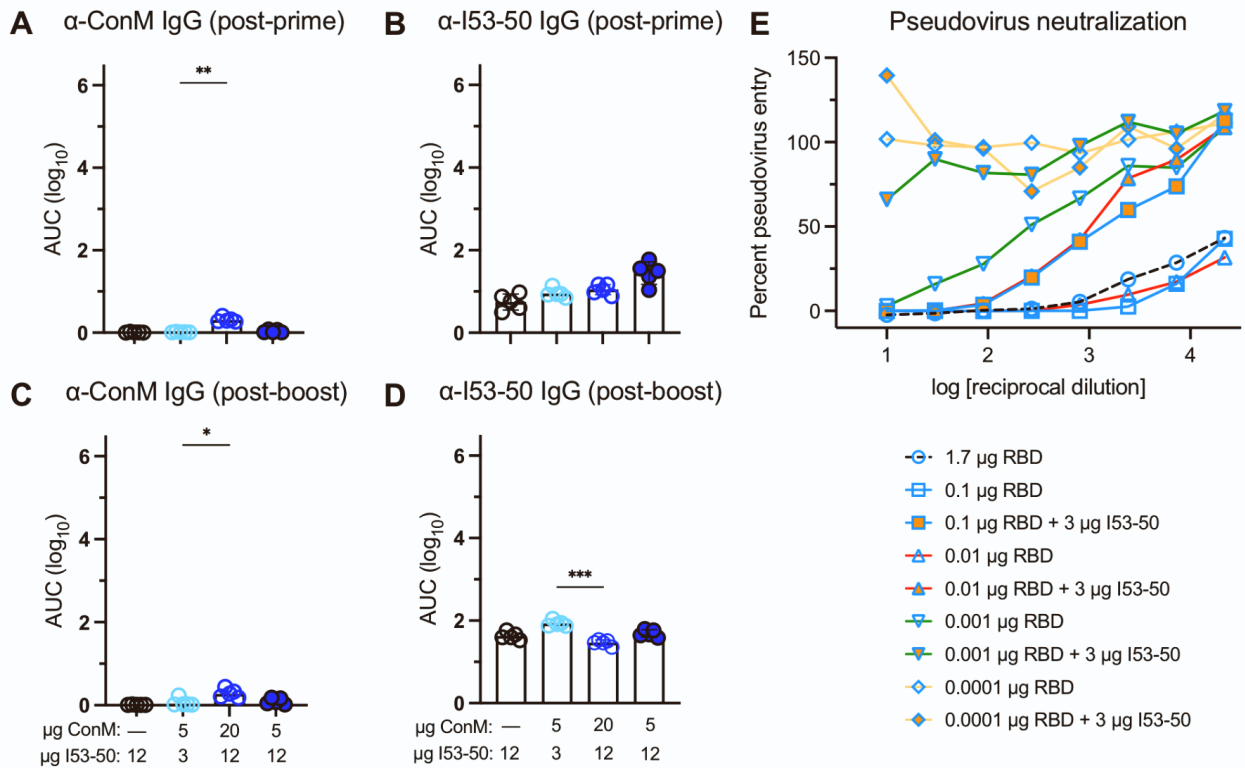

**Figure S7. Anti-ConM and Anti-I53-50 Antibody Responses at Different ConM-I53-50 Doses and with Co-delivered Excess I53-50 Scaffold, Related to Figure 5**

(A-D) Post-prime (week 2) (A and B) and post-boost (week 5) (C and D) anti-HIV-1 Env (ConM) (A and C) and anti-I53-50 scaffold (B and D) serum IgG binding titers in BALB/c mice immunized with the protein doses indicated at the bottom, measured by ELISA and plotted as the area under the curve (AUC) for each serum dilution series. Each symbol represents an individual animal and the geometric mean AUC from each group is indicated by the bar (N=5 mice/group). *P* values between groups were determined by Brown-Forsythe and Welch one-way ANOVA test, with Dunnett's T3 multiple comparisons test. \**p* < 0.05; \*\**p* < 0.01; \*\*\**p* < 0.001; \*\*\*\**p* < 0.0001.

(E) Percent pseudovirus entry curves used for calculating reciprocal IC<sub>50</sub> titer (log<sub>10</sub>) values in Figure 5J. Each symbol represents the arithmetic mean of N=5 mice/group.

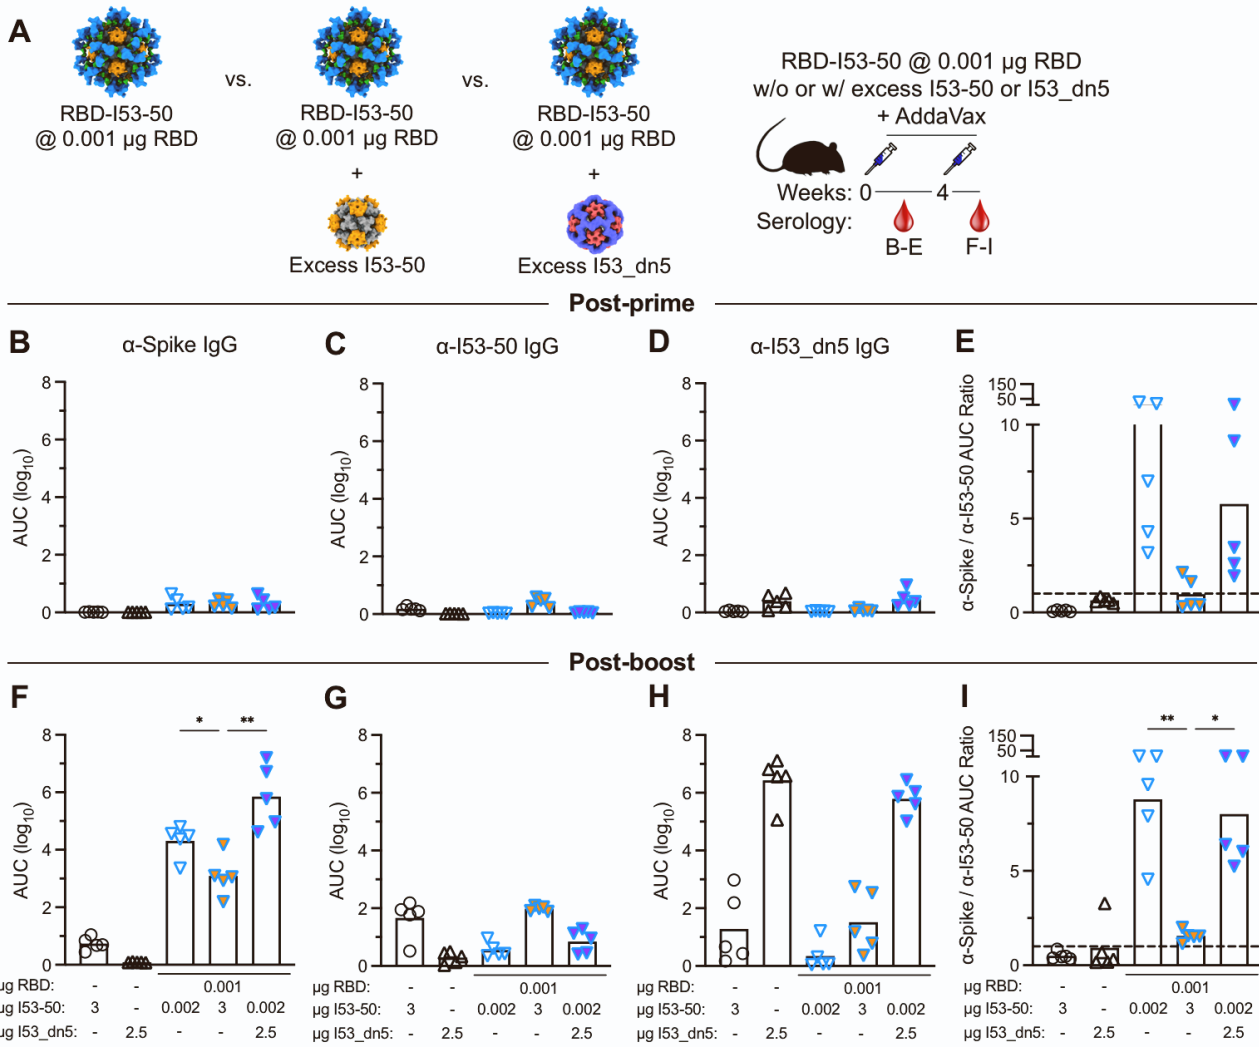

**Figure S8. Heterologous Scaffold-specific Antibody Responses do not Competitively Inhibit Antigen-specific Responses when Heterologous Scaffold is Provided in Excess, Related to Figure 5**

(A) (Left) Schematic representation of the homologous I53-50 and heterologous I53\_dn5 scaffold competition experimental design where mice were immunized with the RBD-I53-50 nanoparticle immunogen at an RBD dose of 0.001 µg in the absence of excess scaffold, or co-delivered with excess homologous I53-50 or heterologous I53\_dn5 nanoparticle scaffold. (Right) Schematic depicting the study timeline and blood collection time points that each data panel represents.

(B-I) Post-prime (week 2) (B-E) and post-boost (week 6) (F-I) anti-SARS-CoV-2 Spike (B and F), anti-I53-50 scaffold (C and G), and anti-I53\_dn5 scaffold serum IgG binding titers in BALB/c mice immunized with the protein doses indicated at the bottom of F-I, measured by ELISA and plotted as the area under the curve (AUC) for each serum dilution series. Each symbol represents an individual animal and the geometric mean AUC from each group is indicated by the bar (N=5 mice/group).

(E and I) Ratio of the post-prime (week 2) (E) and post-boost (week 6) (I) Spike-specific to I53-50 scaffold-specific binding antibody titers (AUC). The black dashed line indicates a ratio of 1.

*P* values between groups were determined by Brown-Forsythe and Welch one-way ANOVA test, with Dunnett's T3 multiple comparisons test. \**p* < 0.05; \*\**p* < 0.01; \*\*\**p* < 0.001; \*\*\*\**p* < 0.0001.

**Table S1. Amino acid sequences for proteins used in this study, Related to STAR Methods**

**Non-antigen-bearing nanoparticle components**

**>I53\_dn5A pentamer**

MGKYDGSKLRIGILHARWNAEII LALVLGALKRLQEFVGVKRENI I IETVPGSFELPYGSKLFVEKQKRLGKPLDAI IPIGVLIKSTMHFEY  
ICDSTTHQLMKNLNFELGIPVIFGVLTCLTDEQAEARAGLIEGKMHNHGEDWGAAAVEMATKFNLEHHHHHH

**>I53\_dn5A\_1cys pentamer**

MGKYDGSKLRIGILHARGNAEII LALVLGALKRLQEFVGVKRENI I IETVPGSFELPYGSKLFVEKQKRLGKPLDAI IPIGVLIRGSTPHFDY  
IADSTTHQLMKNLNFELGIPVIFGVITADTCEQAEARAGLIEGKMHNHGEDWGAAAVEMATKFNGGWELQLEGSHHHHHH

**>I53\_dn5A\_2cys pentamer**

MGKYDGSKLRIGILHARGNAEII LALVLGALKRLQEFVGVKRENI I IETVPGSFELPYGSKLFVEKQKRLGKPLDAI IPIGVLIRGCTPHFDY  
IADSTTHQLMKNLNFELGIPVIFGVITADTCEQAEARAGLIEGKMHNHGEDWGAAAVEMATKFNGGWELQLEGSHHHHHH

**>I53\_dn5Acp7\_ELP1 pentamer**

MGSHHHHHHGSDEQAEERAGTKAGNHGEDWGAAAVEMATKFNSGSGSKYDGSKLRIGILHARGNAEII LELVLGALKRLQEFVGVKRENI I I  
ETVPGSFELPYGSKLFVEKQKRLGKPLDAI IPIGVLIRGSTAHFDYIADSTTHQLMKNLNFELGIPVIFGVLTTESGGSVPGAGVPGVGPV  
GVPAGVPGVGPVPGAGVPGVGPVPGAGVPGVGPVPGAGVPGVGPV

**>I53\_dn5Acp7\_ELP2 pentamer**

MGSHHHHHHGSDEQAEERAGTKAGNHGEDWGAAAVEMATKFNSGSGSKYDGSKLRIGILHARGNAEII LELVLGALKRLQEFVGVKRENI I I  
ETVPGSFELPYGSKLFVEKQKRLGKPLDAI IPIGVLIRGSTAHFDYIADSTTHQLMKNLNFELGIPVIFGVLTTESGGSVPGAGVPGAGVPA  
GVPAGVPGAGVPGAGVPGAGVPGAGVPGAGVPGAGVPGAGVPGAG

**>I53\_dn5Acp7\_PAS pentamer**

MGSHHHHHHGSDEQAEERAGTKAGNHGEDWGAAAVEMATKFNSGSGSKYDGSKLRIGILHARGNAEII LELVLGALKRLQEFVGVKRENI I I  
ETVPGSFELPYGSKLFVEKQKRLGKPLDAI IPIGVLIRGSTAHFDYIADSTTHQLMKNLNFELGIPVIFGVLTTESGGSPAPAPASPAAP  
APSAPAAASPAAPAPASPAAPAPSAPAAASPAAPAPASPAAPAPSAPAA

**>I53\_dn5A pentamer (I53\_dn5A.2, optimized for mammalian cell secretion)**

MDSKGSSQKGSRLLLLLLVSNLLLPQGVLAKYDGSKLRIGILHARGNAEII LELVLGALKRLQEFVGVKRENI I IETVPGSFELPYGSKLFVE  
KQKRLGKPLDAI IPIGVLIRGSTAHFDYIADSTTHQLMKNLNFELGIPVIFGVLTTESDEQAEERAGTKAGNHGEDWGAAAVEMATKFNLEEQ  
KLISEEDLHHHHHH

**>I53\_dn5A\_2gly pentamer**

MDSKGSSQKGSRLLLLLLVSNLLLPQGVLAKYDGSKLRIGILHARGNAEII LELVLGALKRLQEFVGVKRENI I IETVPGSFELPYGSKLFVE  
KQKRLGKPLDAI IPIGVLIRGNDTHFDYIADSTTHQLMKNLNFELGIPVIFGVLTTNSTEQAEERAGTKAGNHGEDWGAAAVEMATKFNLEEQ  
KLISEEDLHHHHHH

**>I53\_dn5B trimer**

MEEAELAYLLGELAYKLGEYRIAIRAYRIALKRDPNNAEAWYNLGNAYYKQGRYREAIEYYQKALELDPNNAEAWYNLGNAYYERGEYEEAI  
EYYRKALRLDPNNADAMQNLLNAKMREEGGWELQLOGSLEHHHHHH

**>I53\_dn5B\_2gly trimer**

MDSKGSSQKGSRLLLLLLVSNLLLPQGVLAEEAELAYLLGELAYKLGEYRIAIRAYRIALKYDNLTAEAWYNLGNAYYKQGRYREAIEYYQK  
ALELDPNNAEAWYNLGNAYYERGEYENATEYYRKALRLDPNNADAMQNLLNAKMREELEEQKLISEEDLHHHHHH

**>I53-50A trimer**

MKMEELFKKHKIVAVLRANSVEEAIEKAVAVFAGGVHLIEITFTVPDADTVIKALSVLKEKGAIIGAGTVTSVEQCRKAVESGAEFIVSPHL  
DEEISQFCKEKGVFYMPGVMPTTELVKAMKLGHTILKLFPGEVVGPQFVKAMKGFPPNVKFPVPTGGVNLNDNVCEWFKAGVLAVGVGSALVKG  
TPDEVREKAKAFVEKIRGCTELEEOKLISEEDLHHHHHH

**>I53-50A\_4gly trimer**

MDSKGSSQKGSRLLLLLLVSNLLLPOQVLAEEELFKKHKIVAVLRANSVEEAIEKAVAVFAGGVHLIEITFTVPNATTVIKALSVLKEKGAIIGAGTVTSVEYANETVESGAEFIVSPHLDEEISNFTKEKGVFYMPGVMPTTELVKAMKLGHTILKLFPGEVVGPQFVKAMKGFPHNATFVPTG  
GVNLNDNVCEWFKAGVLAVGVGSALVKGTPDEVREKAKAFVEKIRGCTELEEOKLISEEDLHHHHHH

**>I53-50B.4PT1 pentamer**

MNQSHSHKDHETVRIAVVRARWHAEIVDACVSAFEAAMRDIGGDRFAVDVFDVPGAYEIPLHARTLAETGR  
YGAVLGTAFVVGNGIYRHEFVASAVINGMMNVQLNTGVPVLSAVLTPHNYDKSKAHTLLFLALFAVKGME  
AARACVEILAAREKIAAGSLEHHHHHH

**>2obx pentamer**

MNQSHSHKDYETVRIAVVRARWHADIVDQCVSAFEAEMADIGGDRFAVDVFDVPGAYEIPLHARTLAETGR  
YGAVLGTAFVVGNGIYRHEFVASAVIDGMMNVQLSTGVPVLSAVLTPHNYHDSAEHHRFFFEHF'TVKGKE  
AARACVEILAAREKIAAGSLEHHHHHH

**Antigen-bearing nanoparticle components and ELISA antigens**

**>H1MI15-I53\_dn5B trimer (A/Michigan/45/2015 HA 1-676 Y98F no lkr dn5B.SA.WELQ-H)**

MKAILVLLYFTTANADTLCIGYHANNSTDTVDTVLEKNVTVTHSVNLLEDKHNGKLCCKLRGVAPLHLGKCNIAGWILGNPECESLSTASS  
WSYIVETSNSDNGTCFPGDFINYEELREQLSSVSSFERFEIFPKTSSWPNHDSNKGVTAAACPHAGAKSFYKNLIWLKKGNSYKLNQSYIN  
DKGKEVLVLWGIHHPSTTADQQSLYQADAYVFGTSRYSKFKPEIATRPKVRDQEGRMNYWTLVEPGDKITFEATGNLVVPRYAFTMER  
NAGSGIIISDTPVHDCNTTCQTPEGAINSTLSPFQNIHPITIGKCPKYVKSTKLRLATGLRNVPISQSRGLFGAIAAGFIEGGWTGMVDGWYGY  
HHQNEQGSYAADLKSTQNAIDKITNKVNSVIEKMNTQFTAVGKEFNHLEKRIENLNKKVDDGFLDIWTYNAELLVLENERLTDYHDSNVK  
NLYEKVRNQLKNNAKEIGNGCFEFYHKCDNTCMESVKNGTYDYPKYSEEAKLNREKIDGVSAAEEAELAYLLGELAYKLGEYRIAIRAYRIAL  
KRDPNNAEAWYNLGNAYYKQGRYREAIEYYQKALELDPNNAEAWYNLGNAYYERGERGEYEEAIEYYRKALRLDPNNADAMQNLNNAKMREEEGW  
ELOHHHHHH

**>H1MI15-I53-50A trimer (A/Michigan/45/2015 HA 1-676 Y98F)**

MDSKGSSQKGSRLLLLLLVSNLLLPOQVLADTLCIGYHANNSTDTVDTVLEKNVTVTHSVNLLEDKHNGKLCCKLRGVAPLHLGKCNIAGWIL  
GNPECESLSTASSWSYIVETSNSDNGTCFPGDFINYEELREQLSSVSSFERFEIFPKTSSWPNHDSNKGVTAAACPHAGAKSFYKNLIWLKVK  
GNSYKLNQSYINDKGKEVLVLWGIHHPSTTADQQSLYQADAYVFGTSRYSKFKPEIATRPKVRDQEGRMNYWTLVEPGDKITFEATG  
NLVVPRYAFTMERNAGSGIIISDTPVHDCNTTCQTPEGAINSTLSPFQNIHPITIGKCPKYVKSTKLRLATGLRNVPISQSRGLFGAIAAGFIE  
GGWTGMVDGWYGYHHQNEQGSYAADLKSTQNAIDKITNKVNSVIEKMNTQFTAVGKEFNHLEKRIENLNKKVDDGFLDIWTYNAELLVLE  
NERLTDYHDSNVKNLYEKVRNQLKNNAKEIGNGCFEFYHKCDNTCMESVKNGTYDYPKYSEEAKLNREKIDGVSAGSGSGSGSGSGGSEKA  
AKAEEAARKMEELFKKHKIVAVLRANSVEEAIEKAVAVFAGGVHLIEITFTVPDADTVIKALSVLKEKGAIIGAGTVTSVEQCRKAVESGAE  
FIVSPHLDEEISQFCKEKGVFYMPGVMPTTELVKAMKLGHTILKLFPGEVVGPQFVKAMKGFPPNVKFPVPTGGVNLNDNVCEWFKAGVLAVGV  
GSALVKGTPDEVREKAKAFVEKIRGCTELEEOKLISEEDLHHHHHH

**>H1MI15-foldon trimer (A/Michigan/45/2015 HA 1-676 Y98F FAH)**

MDSKGSSQKGSRLLLLLLVSNLLLPOQVLADTLCIGYHANNSTDTVDTVLEKNVTVTHSVNLLEDKHNGKLCCKLRGVAPLHLGKCNIAGWIL  
GNPECESLSTASSWSYIVETSNSDNGTCFPGDFINYEELREQLSSVSSFERFEIFPKTSSWPNHDSNKGVTAAACPHAGAKSFYKNLIWLKVK  
GNSYKLNQSYINDKGKEVLVLWGIHHPSTTADQQSLYQADAYVFGTSRYSKFKPEIATRPKVRDQEGRMNYWTLVEPGDKITFEATG  
NLVVPRYAFTMERNAGSGIIISDTPVHDCNTTCQTPEGAINSTLSPFQNIHPITIGKCPKYVKSTKLRLATGLRNVPISQSRGLFGAIAAGFIE  
GGWTGMVDGWYGYHHQNEQGSYAADLKSTQNAIDKITNKVNSVIEKMNTQFTAVGKEFNHLEKRIENLNKKVDDGFLDIWTYNAELLVLE  
NERLTDYHDSNVKNLYEKVRNQLKNNAKEIGNGCFEFYHKCDNTCMESVKNGTYDYPKYSEEAKLNREKIDGVSAGSGYIPEAPRGOAYVRKD  
GEWVLLSTFLGSLNDIFEAKIEWHEGHHHHHH

>H1M15-1na0C3\_int2 trimer (A/Michigan/45/2015 HA 1-676 Y98F no lkr 1na0C3\_int2.SA.WELQ-H)

MKAILVLLYFTTANADTLICIGYHANNSTDTVDTVLEKNVTVTHSVNLLLEDKHNGLCKLRGVAPLHLGKCNIAGWILGNPECESLSTASS  
WSYIVETSNSDNGTCFPGDFINYEELREQLSSVSSFERFEIFPKTSSWPNHDSNKGVTAAACPHAGAKSFYKNLIWLVKKGNYPKLNQSYIN  
DKGKEVLVLWGIHHPSTTADQQSLYQNAADAYVFGTSRYSKFKPEIATRPKVRDQEGRMNYWTLVEPGDKITFEATGNLVVPRYAFTMER  
NAGSGIIISDTPVHDCNNTCQTPEGAINTSLPFQNIHPITIGKCPKYVKSTKLRLATGLRNVPSIQSRGLFGAIAAGFIEGGWTGMVDGWYGY  
HHQNEQSGSYAADLKSTQNAIDKI TNKVN SVIEKMNTQFTAVGKEFNHLEKRIENLNKKVDDGFLDIWTYNAELLVLENERTLDYHDSNVK  
NLYEKVRNQLKNNAKEI GNGCFEFYHKCDNTCMESVKNGTDYDPKYSEEAKLNREKIDGVSAAEEAELAYLLGELAYKLGEYRIAIRAYRIAL  
KRDPNNAEAWYNLGNAYYKQGDYDEAIEYYQKALELDPNNAEAWYNLGNAYYKQGDYDEAIEYYQKALELDPNNAEAKQNLGNKQKQGGW  
ELOHHHHH

>SARS-CoV-2\_RBD-I53-50A trimer (16GS linker, using wild type RBD from Wuhan-Hu-1)

MGILPSPGMPALLSLVSLLSVLLMGCVAETGTRFPNITNLCPFGEVFNATRFASVYAWNRRKISNCVADYSVLYNSASFSTFKCYGVSPTKL  
NDLCFTNVYADSFVIRGDEVQRQIAPGQTGKIADYNYKLPDDFTGCVIAWNSNNLDSKVGGNYNLYRLFRKSNLKPFFERDISTEIQAGSTP  
CNGVEGFNCYFPLQSYGFQPTNGVGYQPYRVVLSFELLHAPATVCGPKKSTGGSGGSGGSGGSGSEKAAKAAEAAARKMEELFKKKHIVA  
VLRANSVEEAIEKAVAVFAGGVHLIEITFTVPDADTVIKALSVLKEKGAIIGAGT VTSVEQARKAVESGAEFIVSPHLDEEISQFAKEKGVF  
YMPGVMTPTTELKAMKLGHTILKLFPGEVVGPQFVKAMKGFPPNVKFPVPTGGVNLDNVAEWFKAGVLAVGVGSALVKGTPDEVREKAKAFVE  
KIRGATEGGSHHHHHHHH

>SARS-CoV-2\_SpikeHexaPro-foldon trimer

MFVFLVLLPLVSSQCVNLTTRTQLPPAYTNSFTRGVYYPDKVFRSSVLHSTQDLFLPFFSNVTWFHAIHVSGTNGTKRFDNPVLPFNDGVYF  
ASTEKSNIIRGWI FGTTLDSKTQSLIIVNNATNVVIKVFCEQFCNDPFLGVYHKNNKSWMESEFRVYSSANNCTFEYVSQPFLMDLEGKQG  
NFKNLREFVFKNIDGYFKIYKHTPINLVRDLDPQGFSALEPLVDLPIGINITRFQTLALHRSYLTGPDSSSGWTAGAAAYVGYLQPRFTL  
LKYNENGTITDAVDCALDPLSETKCTLKSFTVEKGIYQTSNFRVQPTESIVRFPNITNLCPFGEVFNATRFASVYAWNRRKISNCVADYSVL  
YNSASFSTFKCYGVSPTKLNLCFTNVYADSFVIRGDEVQRQIAPGQTGKIADYNYKLPDDFTGCVIAWNSNNLDSKVGGNYNLYRLFRKSN  
LKPFFERDISTEIQAGSTPCNGVEGFNCYFPLQSYGFQPTNGVGYQPYRVVLSFELLHAPATVCGPKKSTNLVKNKCVNFNGLTGTGVL  
TESNKKFLPFQQFGRDIADTTDAVRDPQTEILDITPCSFSGVSVITPGTNTSNQVAVLYQDVNCTEVPVAIHADQLTPTWRVYSTGSNVFQ  
TRAGCLIGAEHVNSYECDIPIGAGICASYQTQTNPSGSASSVASQSI IAYTMSLGAENSVAYSNSIAIPTNFTISVTTEILPVSMTKTSV  
DCTMYICGDSTECSNLLQYGSFCTQLNRALTGIAVEQDKNTQEVFAQVKQIYKTPPIKDFGGFNFSQILPDPSKPSKRSPIEDLLFNKVTL  
ADAGFIKQYGDCLGDIAARDLICAQKFNGLTVLPPLLTDEMAIQYTSALLAGTITSGWTFGAGPALQIPFPMQAYRFNGIGVTQNVLYENQ  
KLIANQFN SAIGKIQDSLSTPSALGKLQDVVNQNAQALNTLVKQLSSNFGAISSVLNDILSRLDPEAEVQIDRLITGRLQSLQTYVTQQL  
IRAAEIRASANLAATKMSECVLQSKRVDFCGKGYHLMSPQSAPHGVVFLHVITYVPAQEKNF TPAI CHDGKAHFPREGV FVSNGTHWV  
TQRNFYEPQIITTDNTFVSGNCDVVI GIVNNTVYDPLQPELDSFKEELDKYFKNHTSPDVLGDISGINASV VNIQKEIDRLNEVAKNLNES  
LIDLQELGKYEQSGYIPEAPRDGOAYVRKDG EWVLLSTFLGRSLEVLFOGPGHHHHHHHSAWSHPQFEKGGGSGGGGSGGSAWSHPQFEK

>RSV-F\_DS-Cav1-I53-50A trimer

MELLILKANAITTILTAVTF CFASGQNI TEEFYQSTCSAVSKGYLSALRTGWYTSVITIELSNIKENKCNNGTDAKVLIKQELDKYKNAVTE  
LQLLMQSTPATNNRARELPRFMNYTLNNAKKTNTVLSKKRKRRLGFLLLGVGSAIASGVAVCKVLHLEGEVNIKIKSALLSTNKAVVLSNG  
VSVLTFKVLDLKNIIDKQLLPILNKQSCSISNIETVIEFQKNNRLEITREFSVNAGVTPVSTYMLTNSSELLSLINDMPI TNDQKKLMSN  
NVQIVRQSYSIMCIIKEEVLAYVVQLPLYGVIDTPCWKLHTSPLCTTNTKEGSNICLTRTRDRGWYCDNAGSVSFFPQAETCKVQSNRVFCD  
TMNSLTL PSEVNL CNVDIFNPKYDCKIMTSKTDVSSSVITSLGAI VSCYGKTKCTASNKNRGIKTF SNGCDYVSNKGVDTV SVGNTLYYVN  
KQEGKSLYVKGEPIINFYDPLVFP SDEFDASISQVNEKINQSLAFIRKSD ELLGSGGSGGSGGSEKAAKAAEAAARKMEELFKKKHIVAVLR  
ANSVEEAIEKAVAVFAGGVHLIEITFTVPDADTVIKALSVLKEKGAIIGAGT VTSVEQCRKAVESGAEFIVSPHLDEEISQFCKEKGVFYMP  
GVMTPTTELKAMKLGHTILKLFPGEVVGPQFVKAMKGFPPNVKFPVPTGGVNLDNVCEWFKAGVLAVGVGSALVKGTPDEVREKAKAFVEKIR  
GCTELEHHHHH

>RSV-F\_DS-Cav1-foldon trimer

MELLILKANAITTILTAVTF CFASGQNI TEEFYQSTCSAVSKGYLSALRTGWYTSVITIELSNIKENKCNNGTDAKVLIKQELDKYKNAVTE  
LQLLMQSTPATNNRARELPRFMNYTLNNAKKTNTVLSKKRKRRLGFLLLGVGSAIASGVAVCKVLHLEGEVNIKIKSALLSTNKAVVLSNG  
VSVLTFKVLDLKNIIDKQLLPILNKQSCSISNIETVIEFQKNNRLEITREFSVNAGVTPVSTYMLTNSSELLSLINDMPI TNDQKKLMSN  
NVQIVRQSYSIMCIIKEEVLAYVVQLPLYGVIDTPCWKLHTSPLCTTNTKEGSNICLTRTRDRGWYCDNAGSVSFFPQAETCKVQSNRVFCD  
TMNSLTL PSEVNL CNVDIFNPKYDCKIMTSKTDVSSSVITSLGAI VSCYGKTKCTASNKNRGIKTF SNGCDYVSNKGVDTV SVGNTLYYVN



KQEGKSLYVKGEPIINFYDPLVFPSEDFDASISQVNEKINQSLAFIRKSDHELLSAIGGYIPEAPRDGOAYVRKDGWVLLSTFLENLYFOSS  
AWSHPOFEKGGGSGGSAWSHPOFEKGGSGSGLNDIFEAKIEWHEGSGSGSHHHHHHHH

**>HIVenv(AMC009)-I53-50A trimer**

ADKLWVTVYYGVPVWKDACTTLFCASDAKAYDTEKRNWATHCCVPTDPNPQEVVLENTENFNMWKNMVEQMHEDIISLWDQSLKPCVKL  
TPLCVTLNCTDYVGNATNASTTNATGGIGGTVERGEIKNCSFNITTSLRDKVQKEYALFYKLDIVPIDNDNTNNTYRLINCNTTVIKQACPK  
VSFEPIPIHYCAPAGFAILKCNDDKFNFGTGPCTNVSTVQCTHGIRPVVSTQLLNGLSLAEKEVIIRSQNFTNNAKVIIVQLNESVVINCTRP  
NNNTVKSIIHIAPGQWFYTGAIIGDIRQAHCNISRVKWNNTLKQIATKLREQFKNKTIAFNQSSGGDPEIVMHSFNCGGEFFYCNTTQLFNS  
TWNDEVSNTDITHITLPCRICKQIINMWQVRVQAMYPPIRGQIRCSSNITGLLLTRDGGSNENKTSETETFRPAGGDMDRDNWRSELYKYK  
VVKIEPLGVAPTRCKRRRVVQRRRRRAVGAIGAVSLGFLGAAGSTMGAASMTLTVQARQLLSGIVQQNNCLRAPECQQHMLKDTHWGIKQL  
QARVLAVEHYLRDQQLGIWGC SGKLI CCTAVPWNNTWSNRSLDMIWNNMTWIEWEREIDNYTGLIYNLLEESQNQQEKNEQELLELDGSGG  
SGGSGGSGGSEKAAKAEAAARKMEELFKKHKIVAVLRANSVEEAIEKAVAVFAGGVHLIEITFTVTPDADTVIKALSVLKEKGAIIGAGTVTS  
VEQCRKAVESGAEFIVSPHLDEEISQFCKEKGVFYMFGVMTPTTELVKAMKLGHTILKLPGEVVGPFVKAMKGFPPNVKVFVPTGGVNLDNV  
CEWFKAGVLAVGVGSALVKGTPDEVREKAKAFVEKIRGCTE

**>HIVenv(ConM)-I53-50A trimer**

AENLWVTVYYGVPVWKDAETTLFCASDAKAYDTEKRNWATHCCVPTDPNPQEVVLENTENFNMWKNMVEQMHTDIISLWDQSLKPCVKL  
TPLCVTLNCTDVNATNNTNNEEIKNCSFNITTELRLDKKKKVVYALFYKLDVVPIDNNSYRLINCNTSAITQACPKVSFEPIPIHYCAPAGF  
AILKCNDDKFNFGTGPCKNVSTVQCTHGIRPVVSTQLLNGLSLAEIIIIRSENI TNAKTIIVQLNESVEINCTRPNNNTRKSIRIGPGQWF  
YATGDIIGDIRQAHCNISRTKWNKTLOQVAKKLRHFNKTIIFNPSSGGDLEITTHSFNCGGEFFYCNTSELFNSTWNGTNTITLPCRICKQ  
IINMWQVRVQAMYPPIEGKIRCTSNI TGLLLTRDGGNNNTETFRPGGGDMDRDNWRSELYKYKVVVKIEPLGVAPTRCKRRRVERRRRRAV  
IGAVFLGFLGAAGSTMGAASMTLTVQARNLLSGIVQQSNLLRAPECQQHLLQLTVWGIKQLQARVLAVERYLKDQQLGIWGC SGKLI CCT  
NVPWNSSWSNKSQDEIWDNMTWMEWDKEINNYTDIISLIEESQNQQEKNEQELLALDGGSGGSGGSGGSEKAAKAEAAARKMEELFKKH  
KIVAVLRANSVEEAIEKAVAVFAGGVHLIEITFTVTPDADTVIKALSVLKEKGAIIGAGTVTSVEQCRKAVESGAEFIVSPHLDEEISQFCKE  
KGVFYMFGVMTPTTELVKAMKLGHTILKLPGEVVGPFVKAMKGFPPNVKVFVPTGGVNLDNVCEWFKAGVLAVGVGSALVKGTPDEVREKAK  
AFVEKIRGCTE

**>HIVenv(AMC009)-8xHis trimer**

ADKLWVTVYYGVPVWKDACTTLFCASDAKAYDTEKRNWATHCCVPTDPNPQEVVLENTENFNMWKNMVEQMHEDIISLWDQSLKPCVKL  
TPLCVTLNCTDYVGNATNASTTNATGGIGGTVERGEIKNCSFNITTSLRDKVQKEYALFYKLDIVPIDNDNTNNTYRLINCNTTVIKQACPK  
VSFEPIPIHYCAPAGFAILKCNDDKFNFGTGPCTNVSTVQCTHGIRPVVSTQLLNGLSLAEKEVIIRSQNFTNNAKVIIVQLNESVVINCTRP  
NNNTVKSIIHIAPGQWFYTGAIIGDIRQAHCNISRVKWNNTLKQIATKLREQFKNKTIAFNQSSGGDPEIVMHSFNCGGEFFYCNTTQLFNS  
TWNDEVSNTDITHITLPCRICKQIINMWQVRVQAMYPPIRGQIRCSSNITGLLLTRDGGSNENKTSETETFRPAGGDMDRDNWRSELYKYK  
VVKIEPLGVAPTRCKRRRVVQRRRRRAVGAIGAVSLGFLGAAGSTMGAASMTLTVQARQLLSGIVQQNNCLRAPECQQHMLKDTHWGIKQL  
QARVLAVEHYLRDQQLGIWGC SGKLI CCTAVPWNNTWSNRSLDMIWNNMTWIEWEREIDNYTGLIYNLLEESQNQQEKNEQELLELDGSGS  
GGSGHHHHHHH

**>HIVenv(ConM)-8xHis trimer**

AENLWVTVYYGVPVWKDAETTLFCASDAKAYDTEKRNWATHCCVPTDPNPQEVVLENTENFNMWKNMVEQMHTDIISLWDQSLKPCVKL  
TPLCVTLNCTDVNATNNTNNEEIKNCSFNITTELRLDKKKKVVYALFYKLDVVPIDNNSYRLINCNTSAITQACPKVSFEPIPIHYCAPAGF  
AILKCNDDKFNFGTGPCKNVSTVQCTHGIRPVVSTQLLNGLSLAEIIIIRSENI TNAKTIIVQLNESVEINCTRPNNNTRKSIRIGPGQWF  
YATGDIIGDIRQAHCNISRTKWNKTLOQVAKKLRHFNKTIIFNPSSGGDLEITTHSFNCGGEFFYCNTSELFNSTWNGTNTITLPCRICKQ  
IINMWQVRVQAMYPPIEGKIRCTSNI TGLLLTRDGGNNNTETFRPGGGDMDRDNWRSELYKYKVVVKIEPLGVAPTRCKRRRVERRRRRAV  
IGAVFLGFLGAAGSTMGAASMTLTVQARNLLSGIVQQSNLLRAPECQQHLLQLTVWGIKQLQARVLAVERYLKDQQLGIWGC SGKLI CCT  
NVPWNSSWSNKSQDEIWDNMTWMEWDKEINNYTDIISLIEESQNQQEKNEQELLALDGSGSGGSHHHHHHHH

**Data S1. Rosetta XML code for protein glycosylation, Related to STAR Methods**

```
<ROSETTASCRIPTS>  
<SCOREFXNS>  
  <ScoreFunction name="sfx_clean" weights="beta" symmetric="0" /> //function to obtain a score  
</SCOREFXNS>
```

```

<RESIDUE_SELECTORS>
  <Index name="select_i_enh0" resnums="%%resi_enh0%%" /> //select the residue(s) to glycosylate (these
residues are a "non-enhanced" sequon)
  Not name="not_resis" selector="select" /> //all other residues not selected
  <Index name="select_i_enh1" resnums="%%resi_enh1%%" /> //select the residue(s) to glycosylate (these
residues are an "enhanced" sequon)
  Not name="not_resis" selector="select" /> //all other residues not selected
  Index name="select_i-2" resnums="%%enhresi%%" /> //select the residue i-2 from the N-linked
glycosylation site
  Index name="select_i_score" resnums="%%iresi%%" /> //select Asn residue i that is N-liked
glycosylated to get its score
</RESIDUE_SELECTORS>
<FILTERS>
  EnergyPerResidue name="total_energy_per_res_filter_i" scorefxn="sfx_clean" energy_cutoff="10000"
resnums="%%iresi%%" /> // tests the energy of a particular residue, or interface, or whole protein, or a set
of residues; energy must be less than 10000
  EnergyPerResidue name="total_energy_per_res_filter_i-2" scorefxn="sfx_clean" energy_cutoff="10000"
resnums="%%enhresi%%" /> // tests the energy of a particular residue, or interface, or whole protein, or a
set of residues; energy must be less than 10000
  EnergyPerResidue name="fa_atr_per_res_filter" scorefxn="sfx_clean" score_type="fa_atr"
energy_cutoff="10000" resnums="%%resi%%" />
  EnergyPerResidue name="fa_rep_per_res_filter" scorefxn="sfx_clean" score_type="fa_rep"
energy_cutoff="10000" resnums="%%resi%%" />
  EnergyPerResidue name="fa_dun_per_res_filter" scorefxn="sfx_clean" score_type="fa_dun"
energy_cutoff="10000" resnums="%%resi%%" />
  EnergyPerResidue name="fa_elec_per_res_filter" scorefxn="sfx_clean" score_type="fa_elec"
energy_cutoff="10000" resnums="%%resi%%" />
</FILTERS>

<MOVERS>
  <CreateGlycanSequonMover name="create_motif_enh0" residue_selector="select_i_enh0"
basic_enhanced_n_sequon="0" design_x_positions="1" pack_neighbors="1" scorefxn="sfx_clean" />
  <CreateGlycanSequonMover name="create_motif_enh1" residue_selector="select_i_enh1"
basic_enhanced_n_sequon="1" design_x_positions="1" pack_neighbors="1" scorefxn="sfx_clean" />
  <SimpleGlycosylateMover name="glycosylate_enh0" residue_selector="select_i_enh0"
glycosylation="a-D-Manp-(1->3)-[a-D-Manp-(1->3)-[a-D-Manp-(1->6)]-a-D-Manp-(1->6)]-[b-d-GlcpNAc-(1->4)]-b-D-M
anp-(1->4)-b-D-GlcpNAc-(1->4)-[a-L-Fucp-(1->6)]-b-D-GlcpNAc-" strip_existing="1" />
  <SimpleGlycosylateMover name="glycosylate_enh1" residue_selector="select_i_enh1"
glycosylation="a-D-Manp-(1->3)-[a-D-Manp-(1->3)-[a-D-Manp-(1->6)]-a-D-Manp-(1->6)]-[b-d-GlcpNAc-(1->4)]-b-D-M
anp-(1->4)-b-D-GlcpNAc-(1->4)-[a-L-Fucp-(1->6)]-b-D-GlcpNAc-" strip_existing="1" />
  <SymMinMover name="bb_min" scorefxn="sfx_clean" bb="1" chi="1" jump="0"
type="lbfgs_armijo_nonmonotone" tolerance="0.005" max_iter="100" />
  <GlycanTreeModeler name="tree_modeler" quench_mode="false" rounds="1" layer_size="1" window_size="0"
hybrid_protocol="1" shear="1" use_gaussian_sampling="1" glycan_sampler_rounds="150" />
  GlycanSampler name="tree_sampler" kt="0" rounds="1" pack_distance="5.0" scorefxn="sfx_clean" />
  GlycanRelaxMover name="basic_relax" />
  GlycanTreeRelax name="tree_relax" quench_mode="false" rounds="1" layer_size="2" window_size="1"/>
</MOVERS>

<PROTOCOLS>
  // wiggle backbone to loosen up a bit
  <Add mover_name="bb_min" />

  // generate sequon (enhanced or not) and add glycan
  <Add mover_name="create_motif_enh0" />
  <Add mover_name="create_motif_enh1" />

  // wiggle backbone to loosen up a bit
  <Add mover_name="bb_min" />

  // filter to extract energy of residues
  Add filter_name="total_energy_per_res_filter_i" />
  Add filter_name="total_energy_per_res_filter_i-2" />
  Add filter_name="fa_atr_per_res_filter" />

```

```
Add filter_name="fa_rep_per_res_filter" />
Add filter_name="fa_dun_per_res_filter" />
Add filter_name="fa_elec_per_res_filter" />

// add glycan and model glycan
<Add mover_name="glycosylate_enh0" />
<Add mover_name="glycosylate_enh1" />
<Add mover_name="tree_modeler" />
Add mover_name="tree_sampler" />
Add mover_name="basic_relax" />
Add mover_name="tree_relax" />
</PROTOCOLS>
</ROSETTASCRIPTS>
```
